# Supplementary material for: Transferrin-Functionalized Liposomes for the Delivery of Gallic Acid: A Therapeutic Approach for Alzheimer’s Disease
Source: MDPI journal article supplement (doi:10.3390/pharmaceutics14102163), 2022-10-11
Supplement: s1 [file s1]

## Supplementary Material

# Transferrin-Functionalized Liposomes for the Delivery of Gallic Acid: A Therapeutic Approach for Alzheimer's Disease

Stéphanie Andrade, Joana A. Loureiro, and Maria C. Pereira

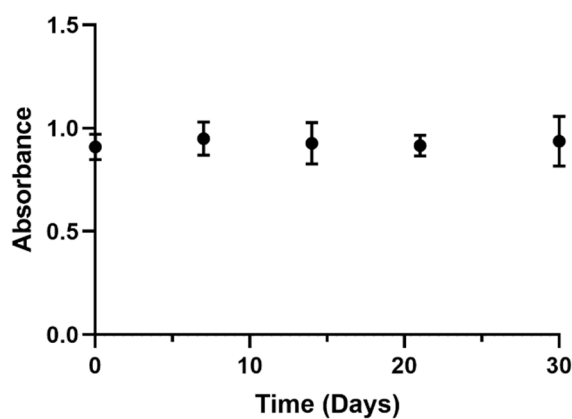

**Figure S1.** Absorbance of GA (150  $\mu$ M) in PBS (pH 7.4, 10 mM) stored in the dark at 4  $^{\circ}$ C for 1 month. Measurements were performed at 258 nm using a Synergy<sup>TM</sup> 2 Multi-Mode Microplate Reader (BioTek Instruments, Winooski, VT, USA), with a well volume of 300  $\mu$ L.
